# Supplementary material for: In Silico Identification and Characterization of circRNAs as Potential Virulence-Related miRNA/siRNA Sponges from Entamoeba histolytica and Encystment-Related circRNAs from Entamoeba invadens
Source: MDPI journal article supplement (doi:10.3390/ncrna8050065), 2022-09-26
Supplement: s1 [file s1]

## Supplementary Material

### 1. Supplementary Figures

**Figure S1. Workflow for identification and partial characterization of circRNAs from *Entamoeba histolytica* and *Entamoeba invadens*.** The programs used in each step are depicted in small letters.

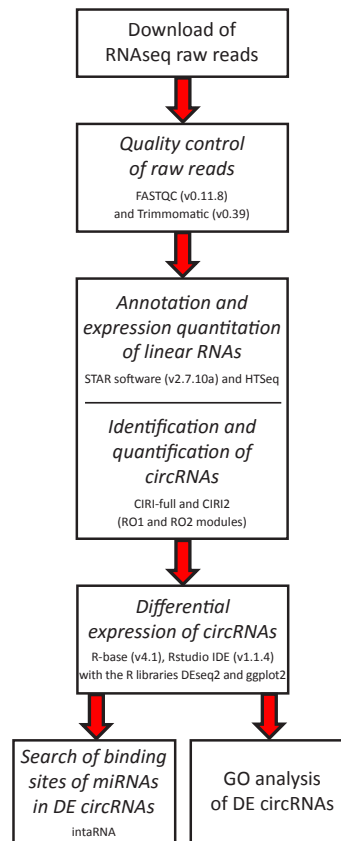

Figure S2. Design and rescue of synthetic circRNA decoy sequence from limited *Entamoeba histolytica* total RNA-Seq libraries

Decoy sequence used:

ATTAAGGTTGCATCTAAGACTGCTAAGAAAGCTGCTAAAGCAGAAAAGAAGGCTGAAAGCAAATTAAGCAAGATTAAGAAGGATGTTAAGAAAGGAACCTAAGACTGCTGCTCAACTCAAGAAGGTACAATCTCAA

Rescued sequences

| Without Decoy          |          |               |             |                 |           |                              |        |                   |            |        |                                                     |  |
|------------------------|----------|---------------|-------------|-----------------|-----------|------------------------------|--------|-------------------|------------|--------|-----------------------------------------------------|--|
| circRNA_ID             | chr      | circRNA_start | circRNA_end | #junction_reads | SM_MS_SMS | #non_junction_junction_reads |        | circRNA_type      | gene_id    | strand | junction_reads_ID                                   |  |
|                        |          |               |             |                 |           | _reads                       | _ratio |                   |            |        |                                                     |  |
| DS571145:504073 504213 | DS571145 | 504073        | 504213      | 1               | 1_1_0     | 10                           | 0.167  | exon              | EHI_153780 | -      | ERR058005.11348,                                    |  |
| DS571153:94757 94905   | DS571153 | 94757         | 94905       | 3               | 3_1_0     | 3697                         | 0.002  | exon              | EHI_023230 | -      | ERR058005.441055,ERR058005.567414,ERR058005.626926, |  |
| DS571163:34232 34375   | DS571163 | 34232         | 34375       | 2               | 2_2_0     | 161                          | 0.024  | exon              | EHI_096350 | +      | ERR058005.65878,ERR058005.1871775,                  |  |
| DS571168:92541 92882   | DS571168 | 92541         | 92882       | 1               | 1_0_1     | 236                          | 0.008  | exon              | EHI_013220 | +      | ERR058005.80069,                                    |  |
| DS571191:16879 17058   | DS571191 | 16879         | 17058       | 1               | 0_1_1     | 89                           | 0.022  | exon              | EHI_194220 | +      | ERR058005.1571799,                                  |  |
| DS571234:36366 37151   | DS571234 | 36366         | 37151       | 1               | 1_1_0     | 66                           | 0.029  | exon              | EHI_059870 | +      | ERR058005.1410681,                                  |  |
| DS571244:24189 24328   | DS571244 | 24189         | 24328       | 2               | 2_0_1     | 1578                         | 0.003  | exon              | EHI_146110 | +      | ERR058005.346566,ERR058005.1214370,                 |  |
| DS571253:31443 31610   | DS571253 | 31443         | 31610       | 1               | 1_1_0     | 15                           | 0.118  | exon              | EHI_030420 | +      | ERR058005.396614,                                   |  |
| DS571292:16575 17213   | DS571292 | 16575         | 17213       | 1               | 1_1_0     | 624                          | 0.003  | intergenic_region | n/a        | +      | ERR058005.317030                                    |  |
| DS571377:17778 18245   | DS571377 | 17778         | 18245       | 2               | 1_2_0     | 2                            | 0.667  | exon              | EHI_169670 | -      | ERR058005.1468940,ERR058005.816067,                 |  |

| With Decoy                                                                                                                     |          |               |             |                 |           |                                           |        |                   |            |                   |                                                         |  |
|--------------------------------------------------------------------------------------------------------------------------------|----------|---------------|-------------|-----------------|-----------|-------------------------------------------|--------|-------------------|------------|-------------------|---------------------------------------------------------|--|
| circRNA_ID                                                                                                                     | chr      | circRNA_start | circRNA_end | #junction_reads | SM_MS_SMS | #non_junction_junction_reads_circRNA_type |        | gene_id           | strand     | junction_reads_ID |                                                         |  |
|                                                                                                                                |          |               |             |                 |           | _reads                                    | _ratio |                   |            |                   |                                                         |  |
| DS571145:504073 504213                                                                                                         | DS571145 | 504073        | 504213      | 1               | 1_1_0     | 11                                        | 0.154  | exon              | EHI_153780 | -                 | ERR058005.11348,                                        |  |
| ERR058005.xxxxxx1,ERR058005.xxxxxx2,ERR058005.xxxxxx3,ERR058005.xxxxxx4,ERR058005.xxxxxx5,ERR058005.xxxxxx6,ERR058005.xxxxxx7, |          |               |             |                 |           |                                           |        |                   |            |                   |                                                         |  |
| DS571151:141804 141938                                                                                                         | DS571151 | 141804        | 141938      | 10              | 1_9_0     | 493                                       | 0.039  | exon              | EHI_110740 | +                 | ERR058005.xxxxxx8,ERR058005.xxxxxx9,ERR058005.xxxxxx10, |  |
| DS571153:94757 94905                                                                                                           | DS571153 | 94757         | 94905       | 3               | 3_1_0     | 3697                                      | 0.002  | exon              | EHI_023230 | -                 | ERR058005.441055,ERR058005.567414,ERR058005.626926,     |  |
| DS571163:34232 34375                                                                                                           | DS571163 | 34232         | 34375       | 2               | 2_2_0     | 161                                       | 0.024  | exon              | EHI_096350 | +                 | ERR058005.65878,ERR058005.1871775,                      |  |
| DS571168:92541 92882                                                                                                           | DS571168 | 92541         | 92882       | 1               | 1_0_1     | 236                                       | 0.008  | exon              | EHI_013220 | +                 | ERR058005.80069,                                        |  |
| DS571191:16879 17058                                                                                                           | DS571191 | 16879         | 17058       | 1               | 0_1_1     | 89                                        | 0.022  | exon              | EHI_194220 | +                 | ERR058005.1571799,                                      |  |
| DS571234:36366 37151                                                                                                           | DS571234 | 36366         | 37151       | 1               | 1_1_0     | 66                                        | 0.029  | exon              | EHI_059870 | +                 | ERR058005.1410681,                                      |  |
| DS571244:24189 24328                                                                                                           | DS571244 | 24189         | 24328       | 2               | 2_0_1     | 1578                                      | 0.003  | exon              | EHI_146110 | +                 | ERR058005.346566,ERR058005.1214370,                     |  |
| DS571253:31443 31610                                                                                                           | DS571253 | 31443         | 31610       | 1               | 1_1_0     | 15                                        | 0.118  | exon              | EHI_030420 | +                 | ERR058005.396614,                                       |  |
| DS571292:16575 17213                                                                                                           | DS571292 | 16575         | 17213       | 1               | 1_1_0     | 624                                       | 0.003  | intergenic_region | n/a        | +                 | ERR058005.317030,                                       |  |
| DS571377:17778 18245                                                                                                           | DS571377 | 17778         | 18245       | 2               | 1_2_0     | 2                                         | 0.667  | exon              | EHI_169670 | -                 | ERR058005.1468940,ERR058005.816067,                     |  |

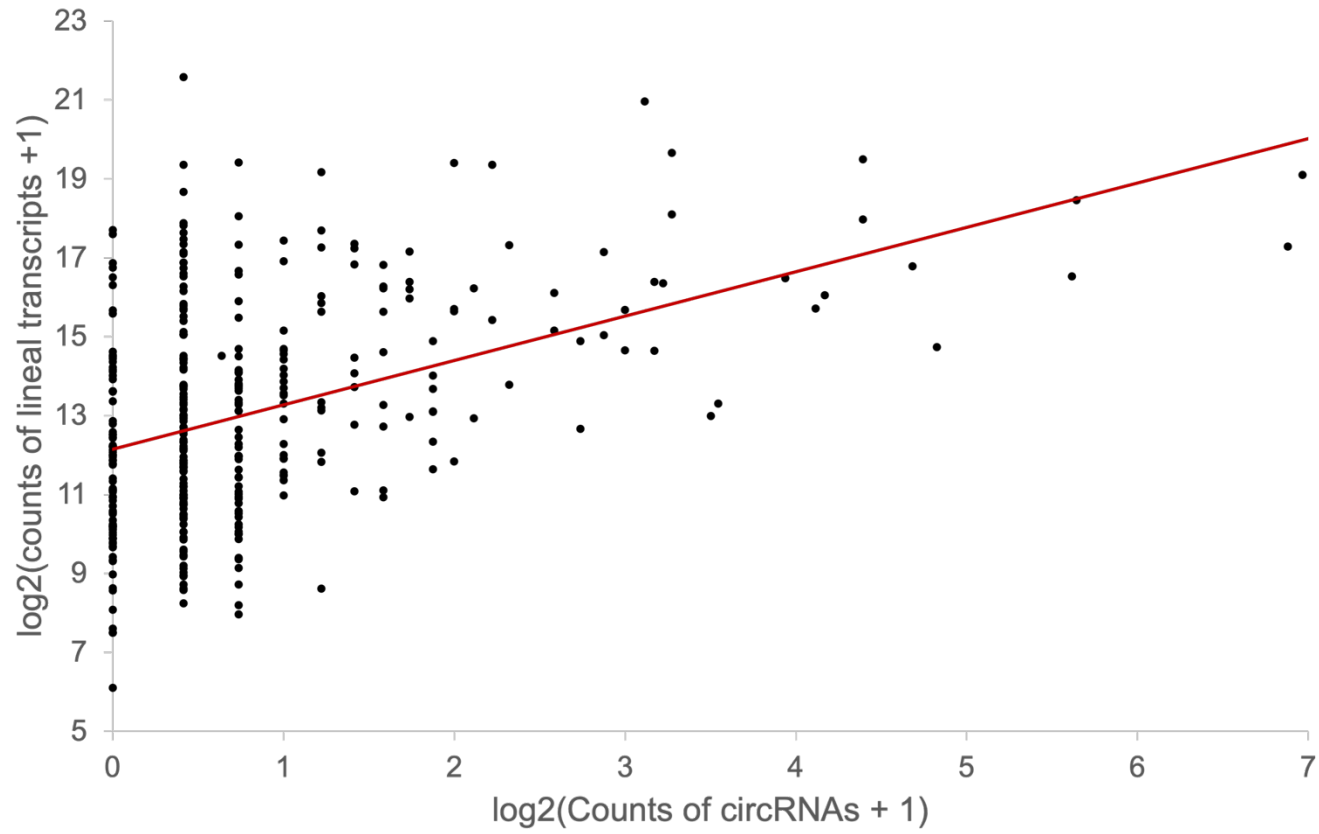

Figure S3. Linear correlation between circRNA and mRNA expression in *Entamoeba histolytica*.

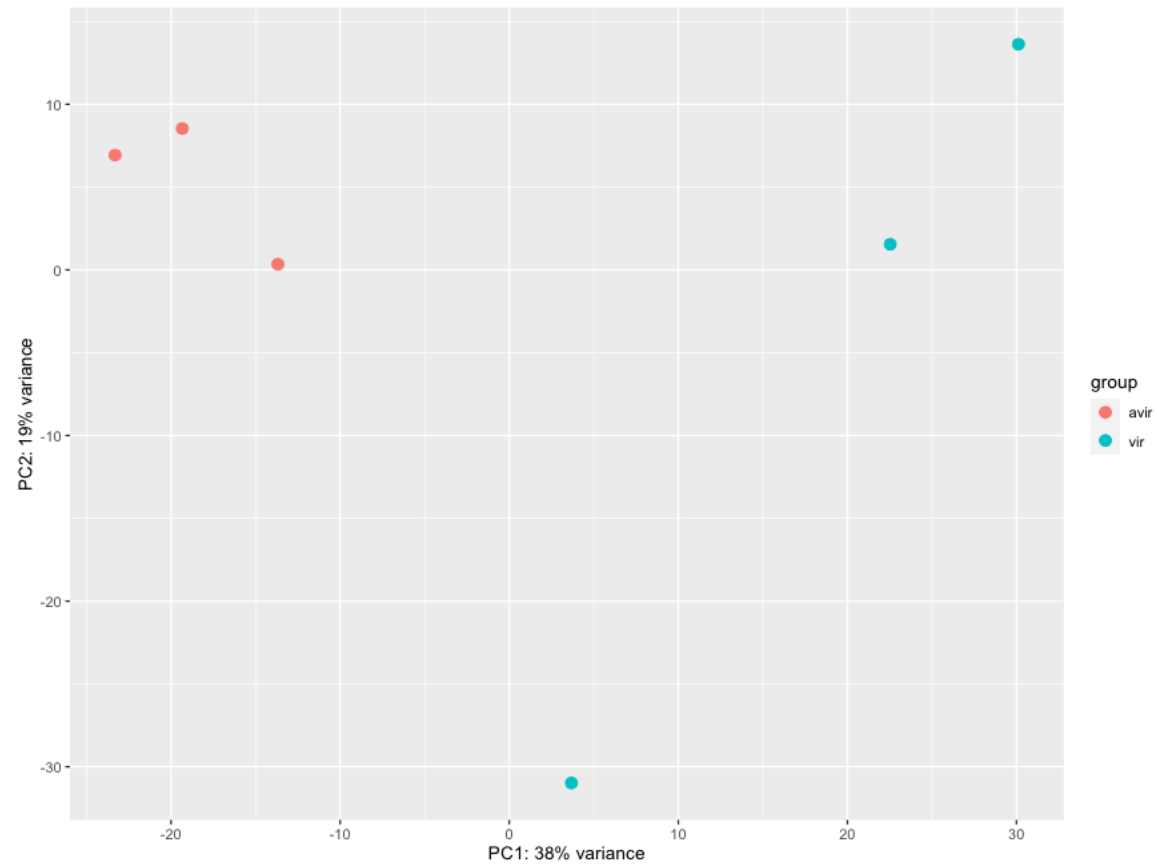

**Figure S4. Principal Components Analysis of the six total RNA-Seq libraries used in this work.** The virulent *Entamoeba histolytica* HM-1:IMSS libraries are plotted in blue dots. The avirulent Rahman E. *histolytica* libraries are plotted in red dots.

## 2. Supplementary Tables

**Table S1. Metabolic process GO terms of *Entamoeba histolytica* HM1:IMSS strain circRNAs**

|    | term_ID    | description                                               | frequency   | plot_X       | plot_Y       | log_size    | Log_pvalue   | uniqueness  | dispensability |
|----|------------|-----------------------------------------------------------|-------------|--------------|--------------|-------------|--------------|-------------|----------------|
| 1  | GO:0006414 | translational elongation                                  | 0.493289439 | 7.65094583   | 0.215479206  | 5.077077067 | -3.38019626  | 0.63096898  | 0              |
| 2  | GO:0032270 | positive regulation of cellular protein metabolic process | 0.436301681 | -2.639331026 | -6.142893568 | 5.02376261  | -1.352638978 | 0.973797674 | 0              |
| 3  | GO:0097435 | supramolecular fiber organization                         | 0.320921711 | -4.651720492 | 1.525521652  | 4.890376301 | -1.974348337 | 0.922195548 | 0.00940424     |
| 4  | GO:0030029 | actin filament-based process                              | 0.379280877 | -3.777717299 | -4.412659159 | 4.962937288 | -1.506154129 | 0.983540201 | 0.00954858     |
| 5  | GO:0046034 | ATP metabolic process                                     | 1.401615485 | -4.670852677 | -2.619475694 | 5.530601779 | -2.7441943   | 0.922868068 | 0.03618763     |
| 6  | GO:0009058 | biosynthetic process                                      | 24.55552771 | -0.031193729 | 6.812710734  | 6.774120957 | -5.153380191 | 0.872684796 | 0.06111925     |
| 7  | GO:0016052 | carbohydrate catabolic process                            | 1.344206391 | -1.76364047  | -1.493405454 | 5.512438902 | -2.421387171 | 0.834639186 | 0.07108273     |
| 8  | GO:0019693 | ribose phosphate metabolic process                        | 2.92249384  | 1.015326329  | -5.675694941 | 5.84972583  | -2.761330343 | 0.550617254 | 0.0723429      |
| 9  | GO:0032787 | monocarboxylic acid metabolic process                     | 2.785819879 | 4.577313194  | -6.547867677 | 5.828925289 | -1.322687681 | 0.660513081 | 0.08994923     |
| 10 | GO:0006091 | generation of precursor metabolites and energy            | 3.310573204 | -2.674585496 | 3.722490095  | 5.903875349 | -2.7441943   | 0.860267836 | 0.09218577     |
| 11 | GO:0044281 | small molecule metabolic process                          | 15.96586237 | -2.159924017 | 5.825774706  | 6.587164106 | -1.506362434 | 0.884317582 | 0.10702689     |
| 12 | GO:0034641 | cellular nitrogen compound metabolic process              | 26.56565976 | 2.593669342  | 1.046492403  | 6.808292286 | -4.782213837 | 0.748213555 | 0.13517013     |
| 13 | GO:0044238 | primary metabolic process                                 | 50.27438061 | 1.174698985  | 5.588388044  | 7.085318376 | -1.343116896 | 0.846965067 | 0.17218878     |
| 14 | GO:0010467 | gene expression                                           | 11.65274909 | 6.532144496  | 5.334749692  | 6.450400161 | -4.777472704 | 0.80964225  | 0.18543611     |
| 15 | GO:0072521 | purine-containing compound metabolic process              | 2.690932536 | 6.420385601  | -2.195366118 | 5.813875088 | -2.551540769 | 0.668128346 | 0.21807938     |
| 16 | GO:0006807 | nitrogen compound metabolic process                       | 45.78921766 | 1.821822306  | 6.420678001  | 7.044734875 | -1.334784784 | 0.8508187   | 0.23601289     |
| 17 | GO:0043603 | cellular amide metabolic process                          | 7.027632371 | 7.079078064  | -2.229850435 | 6.230780902 | -8.168546862 | 0.671290565 | 0.3104676      |
| 18 | GO:1901564 | organonitrogen compound metabolic process                 | 32.51688194 | 3.246522142  | 2.116541702  | 6.896080561 | -2.419007832 | 0.744114702 | 0.34582176     |
| 19 | GO:0044267 | cellular protein metabolic process                        | 15.2980696  | 5.613712904  | 2.030517962  | 6.568608362 | -1.418864815 | 0.676951198 | 0.35919996     |
| 20 | GO:0046939 | nucleotide phosphorylation                                | 0.594843806 | 0.620659349  | -6.622809086 | 5.158377572 | -2.159425662 | 0.704452119 | 0.38991675     |
| 21 | GO:0007015 | actin filament organization                               | 0.206124176 | -4.739473403 | 0.734601151  | 4.698109249 | -2.150714175 | 0.875295571 | 0.40084008     |
| 22 | GO:0044271 | cellular nitrogen compound biosynthetic process           | 14.24186289 | 5.779822816  | -0.66026011  | 6.537538538 | -8.035161754 | 0.562849582 | 0.42282582     |
| 23 | GO:0019538 | protein metabolic process                                 | 19.93516961 | 4.967132475  | 2.414507328  | 6.683591637 | -1.528377661 | 0.694785225 | 0.43443254     |
| 24 | GO:0055086 | nucleobase-containing small molecule metabolic process    | 5.183027529 | 5.88184902   | -3.428913942 | 6.098555474 | -2.212267747 | 0.58326204  | 0.47146561     |
| 25 | GO:0009059 | macromolecule biosynthetic process                        | 11.33841591 | 7.22098644   | 2.999571739  | 6.438524154 | -6.221752614 | 0.694724366 | 0.51353713     |
| 26 | GO:0006413 | translational initiation                                  | 0.515768954 | 7.503807702  | -0.009312863 | 5.096430287 | -2.152584301 | 0.629326829 | 0.52406218     |
| 27 | GO:0007010 | cytoskeleton organization                                 | 0.818651702 | -4.698161545 | 1.079430522  | 5.297072972 | -1.468700619 | 0.903593626 | 0.54693131     |
| 28 | GO:1901566 | organonitrogen compound biosynthetic process              | 15.3359568  | 5.9858644    | 0.843195022  | 6.569682605 | -7.213720399 | 0.627657137 | 0.55409463     |
| 29 | GO:0044264 | cellular polysaccharide metabolic process                 | 0.720257355 | 5.247584244  | 5.189734113  | 5.241461805 | -1.352638978 | 0.78780213  | 0.57375567     |
| 30 | GO:0009206 | purine ribonucleoside triphosphate biosynthetic process   | 0.491170367 | 4.945518533  | -3.659909631 | 5.075207422 | -1.710063737 | 0.419944316 | 0.57519551     |
| 31 | GO:0006096 | glycolytic process                                        | 0.532804146 | 3.627267988  | -3.713939785 | 5.110542575 | -2.159425662 | 0.401943532 | 0.58053335     |
| 32 | GO:0009132 | nucleoside diphosphate metabolic process                  | 0.690020302 | 4.179412457  | -4.742280048 | 5.222836081 | -2.060038045 | 0.500051771 | 0.59968967     |
| 33 | GO:0044249 | cellular biosynthetic process                             | 22.87469451 | 7.325857975  | 1.287619466  | 6.743326993 | -6.083290757 | 0.664367507 | 0.63246679     |
| 34 | GO:0006412 | translation                                               | 5.346943753 | 6.600053193  | 0.308538983  | 6.112077563 | -8.798949261 | 0.516909689 | 0.67137328     |
| 35 | GO:0006090 | pyruvate metabolic process                                | 0.818337765 | 4.208488186  | -7.087767081 | 5.296906398 | -1.882374145 | 0.695110835 | 0.69337288     |

**Table S2. Metabolic process GO terms of *Entamoeba histolytica* Rahman strain circRNAs**

|    | term_ID    | description                                                                       | frequency   | plot_X       | plot_Y       | log_size    | Log_pvalue   | uniqueness  | dispensability |
|----|------------|-----------------------------------------------------------------------------------|-------------|--------------|--------------|-------------|--------------|-------------|----------------|
| 1  | GO:0006414 | translational elongation                                                          | 0.493289439 | -6.029494701 | 3.093196489  | 5.077077067 | -3.132943016 | 0.751575959 | 0              |
| 2  | GO:0008152 | metabolic process                                                                 | 62.77472966 | 4.292832107  | -4.835193606 | 7.181756492 | -1.694018247 | 1           | 0              |
| 3  | GO:0043044 | ATP-dependent chromatin remodeling                                                | 0.058309597 | 3.066843647  | -3.497200063 | 4.149742415 | -1.502185499 | 0.956297521 | 0.00814723     |
| 4  | GO:0055082 | cellular chemical homeostasis                                                     | 0.412744042 | 5.343504558  | -1.362747265 | 4.999656772 | -2.247236514 | 0.790069115 | 0.00962332     |
| 5  | GO:0046034 | ATP metabolic process                                                             | 1.401615485 | 2.469843223  | -5.7928734   | 5.530601779 | -2.876650801 | 0.949920703 | 0.03618763     |
| 6  | GO:0009058 | biosynthetic process                                                              | 24.55552771 | 0.997464326  | -2.008068133 | 6.774120957 | -3.328405302 | 0.917658442 | 0.06111925     |
| 7  | GO:0006091 | generation of precursor metabolites and energy                                    | 3.310573204 | 0.409365599  | -4.493665696 | 5.903875349 | -2.876650801 | 0.906401951 | 0.07337732     |
| 8  | GO:0009056 | catabolic process                                                                 | 6.023915031 | 0.686937655  | -6.503181027 | 6.163850747 | -1.467955564 | 0.93761913  | 0.08226917     |
| 9  | GO:0005975 | carbohydrate metabolic process                                                    | 5.962693259 | 0.136824525  | 8.812833906  | 6.159414381 | -2.936840498 | 0.90425223  | 0.08410537     |
| 10 | GO:0034641 | cellular nitrogen compound metabolic process                                      | 26.56565976 | -2.039806417 | 3.298619239  | 6.808292286 | -2.361133582 | 0.832340768 | 0.13517013     |
| 11 | GO:0044238 | primary metabolic process                                                         | 50.27438061 | -1.342408704 | 8.075322806  | 7.085318376 | -1.526933972 | 0.901593148 | 0.17218878     |
| 12 | GO:0006096 | glycolytic process                                                                | 0.532804146 | -4.579928706 | -1.870536153 | 5.110542575 | -2.894651312 | 0.610424265 | 0.18459208     |
| 13 | GO:0010467 | gene expression                                                                   | 11.65274909 | -3.850079958 | 7.379784143  | 6.450400161 | -2.497415645 | 0.871484852 | 0.18543611     |
| 14 | GO:0007264 | small GTPase mediated signal transduction                                         | 0.257304107 | 5.217200468  | 2.350373901  | 4.794425303 | -1.665360792 | 0.78209225  | 0.196147       |
| 15 | GO:0043618 | regulation of transcription from RNA polymerase II promoter in response to stress | 0.019092303 | 4.787461299  | 2.759044585  | 3.664923893 | -1.502185499 | 0.73159501  | 0.26690368     |
| 16 | GO:0072521 | purine-containing compound metabolic process                                      | 2.690932536 | -4.184571267 | 1.050762493  | 5.813875088 | -2.154965188 | 0.784137774 | 0.26793713     |
| 17 | GO:0031328 | positive regulation of cellular biosynthetic process                              | 0.837223531 | 5.879225189  | -0.844012821 | 5.306815181 | -1.426057453 | 0.848299182 | 0.28544421     |
| 18 | GO:0042780 | tRNA 3'-end processing                                                            | 0.049527633 | -7.086780791 | 0.708029547  | 4.078855403 | -1.502185499 | 0.812313092 | 0.2939335      |
| 19 | GO:1901700 | response to oxygen-containing compound                                            | 0.554783841 | 4.214040046  | 5.109980302  | 5.128098648 | -1.502185499 | 0.76142678  | 0.31224321     |
| 20 | GO:1901564 | organonitrogen compound metabolic process                                         | 32.51688194 | -2.47672999  | 5.454424495  | 6.896080561 | -2.324413465 | 0.833432877 | 0.34582176     |
| 21 | GO:0044271 | cellular nitrogen compound biosynthetic process                                   | 14.24186289 | -4.643875581 | 2.469481264  | 6.537538538 | -5.606035384 | 0.712833335 | 0.34987879     |
| 22 | GO:0019538 | protein metabolic process                                                         | 19.93516961 | -3.581411072 | 4.814376522  | 6.683591637 | -1.83018621  | 0.795521412 | 0.3677588      |
| 23 | GO:0043620 | regulation of DNA-templated transcription in response to stress                   | 0.020063029 | 5.154268622  | 2.875544104  | 3.68645751  | -1.502185499 | 0.761871075 | 0.39242859     |
| 24 | GO:0055086 | nucleobase-containing small molecule metabolic process                            | 5.183027529 | -5.314488896 | -0.123375912 | 6.098555474 | -1.908763498 | 0.731583669 | 0.39660054     |
| 25 | GO:0043603 | cellular amide metabolic process                                                  | 7.027632371 | -4.685388863 | 1.041070885  | 6.230780902 | -5.539544064 | 0.7853298   | 0.42282582     |
| 26 | GO:0006979 | response to oxidative stress                                                      | 0.582480486 | 4.898734578  | 3.942916766  | 5.149256072 | -1.502185499 | 0.792548207 | 0.4264875      |
| 27 | GO:0044267 | cellular protein metabolic process                                                | 15.2980696  | -4.13323287  | 4.045342451  | 6.568608362 | -1.639096964 | 0.775538585 | 0.43443254     |
| 28 | GO:0046939 | nucleotide phosphorylation                                                        | 0.594843806 | -3.273812241 | -5.503496686 | 5.158377572 | -2.894651312 | 0.832641791 | 0.45344761     |
| 29 | GO:0006427 | histidyl-tRNA aminoacylation                                                      | 0.041005906 | -6.300346265 | 0.747096309  | 3.996861768 | -1.502185499 | 0.753388071 | 0.45717927     |
| 30 | GO:0006415 | translational termination                                                         | 0.184136221 | -5.355193643 | 2.268752669  | 4.64912058  | -1.502185499 | 0.744123423 | 0.47756623     |
| 31 | GO:0032787 | monocarboxylic acid metabolic process                                             | 2.785819879 | -5.786119257 | -3.315875584 | 5.828925289 | -1.446593115 | 0.794942545 | 0.49534084     |
| 32 | GO:0051125 | regulation of actin nucleation                                                    | 0.023813745 | 4.434263688  | -1.655019255 | 3.760874638 | -1.502185499 | 0.820072258 | 0.49965912     |
| 33 | GO:0009059 | macromolecule biosynthetic process                                                | 11.33841591 | -5.16011174  | 5.765267642  | 6.438524154 | -4.12911937  | 0.806437913 | 0.51353713     |
| 34 | GO:0006413 | translational initiation                                                          | 0.515768954 | -6.051011397 | 2.873395092  | 5.096430287 | -1.37357074  | 0.750430197 | 0.52406218     |
| 35 | GO:1901566 | organonitrogen compound biosynthetic process                                      | 15.3359568  | -4.640779551 | 4.387452174  | 6.569682605 | -3.97963099  | 0.760388544 | 0.55409463     |
| 36 | GO:0016052 | carbohydrate catabolic process                                                    | 1.344206391 | -1.373598956 | -6.023383389 | 5.512438902 | -2.597427925 | 0.898102019 | 0.57224934     |
| 37 | GO:0019693 | ribose phosphate metabolic process                                                | 2.92249384  | -3.143120047 | -4.635401424 | 5.84972583  | -2.306098633 | 0.748797652 | 0.58053335     |
| 38 | GO:0010035 | response to inorganic substance                                                   | 0.306269959 | 4.198430322  | 5.351346797  | 4.87008187  | -1.502185499 | 0.772016629 | 0.58888319     |
| 39 | GO:0009132 | nucleoside diphosphate metabolic process                                          | 0.690020302 | -5.013064596 | -1.843618949 | 5.222836081 | -2.788803167 | 0.699967872 | 0.59968967     |
| 40 | GO:1901701 | cellular response to oxygen-containing compound                                   | 0.400438553 | 4.347999627  | 4.805407523  | 4.986511975 | -1.502185499 | 0.700908929 | 0.60361767     |
| 41 | GO:0010106 | cellular response to iron ion starvation                                          | 0.001705998 | 5.013665089  | 1.731897647  | 2.617000341 | -1.502185499 | 0.709079225 | 0.61323807     |
| 42 | GO:0044249 | cellular biosynthetic process                                                     | 22.87469451 | -5.701694903 | 4.515952035  | 6.743326993 | -3.896054232 | 0.783750819 | 0.63246679     |
| 43 | GO:0009636 | response to toxic substance                                                       | 1.059618712 | 4.503341164  | 5.006136705  | 5.409122924 | -1.502185499 | 0.748820072 | 0.66391396     |
| 44 | GO:0034599 | cellular response to oxidative stress                                             | 0.208676977 | 4.692855697  | 4.387080636  | 4.703454745 | -1.502185499 | 0.681662283 | 0.66607993     |
| 45 | GO:0006412 | translation                                                                       | 5.346943753 | -5.245337912 | 3.157865838  | 6.112077563 | -5.936926355 | 0.670655414 | 0.67137328     |
| 46 | GO:0062197 | cellular response to chemical stress                                              | 0.231916548 | 4.506051887  | 4.308567077  | 4.749311086 | -1.502185499 | 0.720921196 | 0.67214983     |
| 47 | GO:0006090 | pyruvate metabolic process                                                        | 0.818337765 | -5.733964056 | -3.853120648 | 5.296906398 | -2.598280076 | 0.816034824 | 0.69337288     |

Table S3. Metabolic process GO terms of 20 h encysting *Entamoeba invadens* circRNAs

|    | term_ID    | description                                                                     | frequency   | plot_X       | plot_Y       | log_size    | Log_pvalue   | uniqueness  | dispensability |
|----|------------|---------------------------------------------------------------------------------|-------------|--------------|--------------|-------------|--------------|-------------|----------------|
| 1  | GO:0006090 | pyruvate metabolic process                                                      | 0.818337765 | -6.171301603 | 5.747187447  | 5.296906398 | -2.076582595 | 0.781705906 | 0              |
| 2  | GO:0008152 | metabolic process                                                               | 62.77472966 | 5.534082623  | -0.391117381 | 7.181756492 | -1.741871643 | 1           | 0              |
| 3  | GO:0010038 | response to metal ion                                                           | 0.127817643 | 3.356084459  | 0.072522888  | 4.490576452 | -2.028122311 | 0.973300173 | 0              |
| 4  | GO:0048522 | positive regulation of cellular process                                         | 1.943965783 | 2.809831687  | 5.35637115   | 5.672661151 | -2.535232553 | 0.724096206 | 0              |
| 5  | GO:0071103 | DNA conformation change                                                         | 1.133819285 | 4.872915312  | -2.644003726 | 5.438517034 | -1.875192689 | 0.951566557 | 0.01119524     |
| 6  | GO:0071840 | cellular component organization or biogenesis                                   | 9.17406249  | 5.450350694  | 1.225247703  | 6.346533502 | -1.398425839 | 0.981618327 | 0.01513465     |
| 7  | GO:0006665 | sphingolipid metabolic process                                                  | 0.162924845 | -1.688786095 | 7.319411915  | 4.59596994  | -2.028122311 | 0.792447918 | 0.057          |
| 8  | GO:0006266 | DNA ligation                                                                    | 0.104487195 | -8.413896524 | -0.174715582 | 4.403051853 | -2.028122311 | 0.81180184  | 0.06375612     |
| 9  | GO:0006091 | generation of precursor metabolites and energy                                  | 3.310573204 | -4.689837411 | -7.38478826  | 5.903875349 | -1.680261719 | 0.899020491 | 0.07789929     |
| 10 | GO:1901360 | organic cyclic compound metabolic process                                       | 22.66688499 | -0.157642272 | -4.377076406 | 6.739363532 | -3.577445447 | 0.883715595 | 0.08360293     |
| 11 | GO:0022900 | electron transport chain                                                        | 1.716274987 | 1.646743454  | -6.378397195 | 5.61855953  | -1.729097486 | 0.907392954 | 0.08561969     |
| 12 | GO:0044281 | small molecule metabolic process                                                | 15.96586237 | 2.576246692  | -5.589501856 | 6.587164106 | -1.96480618  | 0.920345114 | 0.10444611     |
| 13 | GO:0009058 | biosynthetic process                                                            | 24.55552771 | -0.258587601 | -7.179377452 | 6.774120957 | -2.184940695 | 0.912700638 | 0.12001212     |
| 14 | GO:1901575 | organic substance catabolic process                                             | 5.550440775 | 3.621884707  | -4.347274342 | 6.128299408 | -1.316248047 | 0.858920453 | 0.12018019     |
| 15 | GO:1901135 | carbohydrate derivative metabolic process                                       | 7.132429372 | 2.346632263  | -3.006398622 | 6.237209343 | -1.993838868 | 0.905789379 | 0.12748679     |
| 16 | GO:0034641 | cellular nitrogen compound metabolic process                                    | 26.56565976 | -3.387879512 | -3.48162257  | 6.808292286 | -6.427747338 | 0.828719376 | 0.13517013     |
| 17 | GO:0010467 | gene expression                                                                 | 11.65274909 | -7.663780113 | -4.478549013 | 6.450400161 | -3.230913867 | 0.873343264 | 0.15350589     |
| 18 | GO:0044237 | cellular metabolic process                                                      | 51.61983861 | -1.762729985 | -6.356506297 | 7.096788289 | -2.116329592 | 0.893646655 | 0.17447766     |
| 19 | GO:0051438 | regulation of ubiquitin-protein transferase activity                            | 0.033735795 | 3.821567284  | 3.662932353  | 3.912115729 | -1.729097486 | 0.86681729  | 0.18822471     |
| 20 | GO:0043603 | cellular amide metabolic process                                                | 7.027632371 | -5.013242072 | -0.185309844 | 6.230780902 | -3.599022715 | 0.777490527 | 0.21274344     |
| 21 | GO:0046483 | heterocycle metabolic process                                                   | 21.90910395 | -3.253247532 | -5.405179069 | 6.72459631  | -3.577445447 | 0.861860125 | 0.2249937      |
| 22 | GO:0006725 | cellular aromatic compound metabolic process                                    | 21.92918763 | -3.982296249 | -5.641058517 | 6.724994237 | -3.005252553 | 0.861834692 | 0.22506621     |
| 23 | GO:1903320 | regulation of protein modification by small protein conjugation or removal      | 0.073634661 | 1.722403952  | 6.23677363   | 4.251078264 | -1.729097486 | 0.818060009 | 0.23015448     |
| 24 | GO:0006807 | nitrogen compound metabolic process                                             | 45.78921766 | -1.143497086 | -6.206501313 | 7.044734875 | -1.51409674  | 0.89829902  | 0.24033434     |
| 25 | GO:0009212 | pyrimidine deoxyribonucleoside triphosphate biosynthetic process                | 0.084783542 | -6.508187832 | 2.206300882  | 4.312304325 | -2.028122311 | 0.641945558 | 0.25959376     |
| 26 | GO:1901566 | organonitrogen compound biosynthetic process                                    | 15.3359568  | -4.070941503 | -1.338234761 | 6.569682605 | -3.409130681 | 0.748602707 | 0.2646145      |
| 27 | GO:0032784 | regulation of DNA-templated transcription, elongation                           | 0.149652761 | 1.983162515  | 5.583031506  | 4.559068334 | -1.555008513 | 0.852236548 | 0.26625219     |
| 28 | GO:0048518 | positive regulation of biological process                                       | 2.11108119  | 2.987675645  | 4.678086548  | 5.708482938 | -2.535232553 | 0.869396129 | 0.30948388     |
| 29 | GO:0006396 | RNA processing                                                                  | 3.831075991 | -6.818128646 | -0.879792241 | 5.967292847 | -1.41035889  | 0.736158695 | 0.33621184     |
| 30 | GO:0051103 | DNA ligation involved in DNA repair                                             | 0.008273882 | -2.041141204 | 0.701178223  | 3.301897717 | -2.028122311 | 0.833408601 | 0.34133344     |
| 31 | GO:0019692 | deoxyribose phosphate metabolic process                                         | 0.194516783 | -3.407802699 | 6.832533218  | 4.672937913 | -1.555008513 | 0.781104198 | 0.38225614     |
| 32 | GO:0080090 | regulation of primary metabolic process                                         | 12.49225279 | 2.589174178  | 5.070756936  | 6.48061252  | -1.373057804 | 0.784195216 | 0.40997633     |
| 33 | GO:0009084 | glutamine family amino acid biosynthetic process                                | 0.621231005 | -6.568131733 | 3.755398264  | 5.177227623 | -2.028122311 | 0.719312198 | 0.44165911     |
| 34 | GO:0071897 | DNA biosynthetic process                                                        | 0.696931038 | -6.861885601 | -0.247622137 | 5.227163993 | -1.729097486 | 0.714347761 | 0.46925544     |
| 35 | GO:0009262 | deoxyribonucleotide metabolic process                                           | 0.269522851 | -5.555552825 | 3.243327111  | 4.81457386  | -1.432069175 | 0.670849565 | 0.47142747     |
| 36 | GO:0006139 | nucleobase-containing compound metabolic process                                | 19.00190213 | -4.977444612 | -0.931901053 | 6.662768783 | -3.023340725 | 0.711476292 | 0.48170302     |
| 37 | GO:0030488 | tRNA methylation                                                                | 0.274475614 | -7.976689733 | -0.629248007 | 4.822481914 | -1.432069175 | 0.798421074 | 0.50314279     |
| 38 | GO:0009263 | deoxyribonucleotide biosynthetic process                                        | 0.191042826 | -5.679384788 | 2.319921974  | 4.665111737 | -1.555008513 | 0.613542407 | 0.50873768     |
| 39 | GO:0055086 | nucleobase-containing small molecule metabolic process                          | 5.183027529 | -6.031697989 | 1.508081658  | 6.098555474 | -1.796211743 | 0.685754726 | 0.51321356     |
| 40 | GO:0010035 | response to inorganic substance                                                 | 0.306269959 | 3.13498613   | -0.102130442 | 4.87008187  | -1.729097486 | 0.978532879 | 0.51945258     |
| 41 | GO:0032787 | monocarboxylic acid metabolic process                                           | 2.785819879 | -6.290136404 | 5.070020698  | 5.828925289 | -1.646640695 | 0.751079347 | 0.52068716     |
| 42 | GO:0009059 | macromolecule biosynthetic process                                              | 11.33841591 | -7.094527827 | -2.75116058  | 6.438524154 | -1.930032196 | 0.786080853 | 0.54872166     |
| 43 | GO:0051338 | regulation of transferase activity                                              | 0.282501652 | 3.551294449  | 4.016062799  | 4.834998954 | -1.337155675 | 0.864969862 | 0.55388264     |
| 44 | GO:0044271 | cellular nitrogen compound biosynthetic process                                 | 14.24186289 | -5.504929714 | -0.918136128 | 6.537538538 | -3.066180489 | 0.702639033 | 0.55409463     |
| 45 | GO:0009141 | nucleoside triphosphate metabolic process                                       | 0.798559758 | -6.110944651 | 2.847009406  | 5.286281279 | -1.432069175 | 0.657903464 | 0.56981163     |
| 46 | GO:0006082 | organic acid metabolic process                                                  | 9.351023607 | -5.705149917 | 3.835989312  | 6.354830957 | -1.577358116 | 0.730719605 | 0.57859047     |
| 47 | GO:0006412 | translation                                                                     | 5.346943753 | -6.041617302 | -0.219883528 | 6.112077563 | -3.046455971 | 0.658766982 | 0.61354827     |
| 48 | GO:0006221 | pyrimidine nucleotide biosynthetic process                                      | 0.629537933 | -5.922628282 | 2.018141995  | 5.182996366 | -1.337155675 | 0.606343862 | 0.61864849     |
| 49 | GO:0032968 | positive regulation of transcription elongation from RNA polymerase II promoter | 0.031149948 | 2.365199552  | 5.912719224  | 3.877486528 | -2.028122311 | 0.75294933  | 0.62865619     |
| 50 | GO:0044249 | cellular biosynthetic process                                                   | 22.87469451 | -4.76175185  | -3.058815802 | 6.743326993 | -2.358063503 | 0.763231479 | 0.63246679     |
| 51 | GO:0090304 | nucleic acid metabolic process                                                  | 13.86055794 | -5.834396063 | -1.195038333 | 6.525752454 | -1.452082915 | 0.699967117 | 0.65202597     |
| 52 | GO:0030261 | chromosome condensation                                                         | 0.086621723 | 4.929984891  | -2.442106475 | 4.32161914  | -1.432069175 | 0.951681973 | 0.65556898     |
| 53 | GO:0001573 | ganglioside metabolic process                                                   | 0.006588538 | -2.710509744 | 5.332363685  | 3.203032887 | -2.028122311 | 0.729052557 | 0.65574368     |
| 54 | GO:0009064 | glutamine family amino acid metabolic process                                   | 1.331140844 | -5.801436691 | 4.66109179   | 5.508196969 | -1.337155675 | 0.739156431 | 0.67985027     |
